# Supplementary material
Source: PubMed Central journal article supplement (PMC1544198)
Supplement: pnas_0604939103_3.pdf [file pnas_0604939103_3.pdf]

A

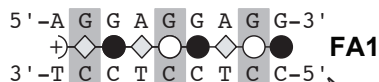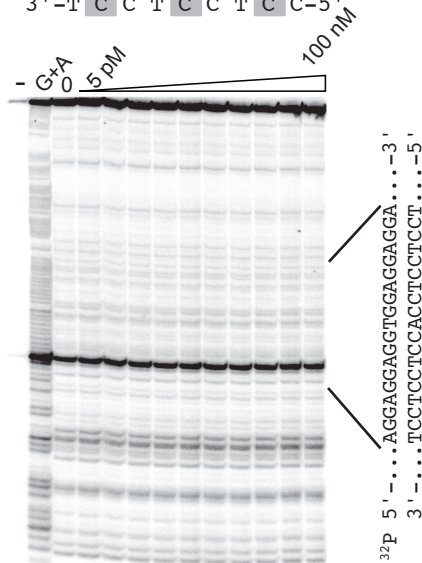

B

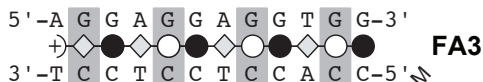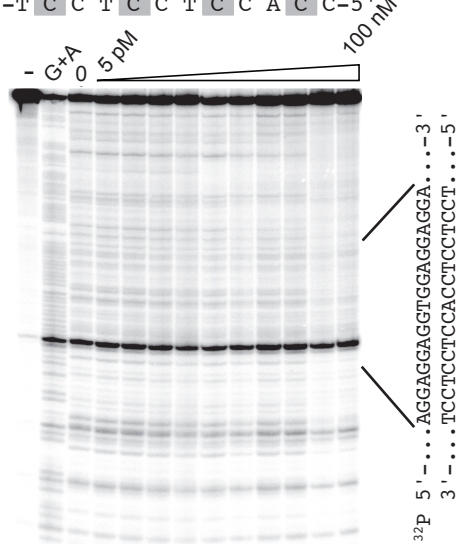

C

5'-. . .GCGCGCTTGCTCCCAATCACAGGAGGAAGGAGGAGGTGGAGGAGGAGGGCTGCCTTGAGGAGTATAA. . .-3'

3'-. . .CGCGGAAACGAGGGTTAGTGTCCCTTCCTCCTCCACCTCCTCCTCCCGACGAACCTCATATT. . .-5'
